# Supplementary material
Source: MDPI journal article supplement (https://www.mdpi.com/1424-2818/14/5/384)
Supplement: s1 [file s1]

Archive with 4 entries (4 files):
- Supplemental Figure S1-proof done.pdf
- Supplemental Figure S2-proof done.pdf
- Supplemental Table S1.pdf
- Supplemental Table S2.pdf
